# Supplementary material
Source: bioRxiv or medRxiv preprint supplement (https://medrxiv.org/highwire/filestream/80823/field_highwire_adjunct_files/2/2020.05.10.20097451-3.pdf)
Supplement: Supplementary file [file 2020.05.10.20097451-3.pdf]

Supplemental Table 5

| Source Type                 | Region (Primary organization)                                                           | Test Characteristics (Test Manufacturer, Type, Sn, Sp, Regulatory Approval)                                                              | Sampling frame and method                                   | Population Sampled   | N     | Dates        | Adjusted | Seroprevalence (95% CI) | Confirmed Cases Per 1M | Risk of Bias (JBI) | Notes                                                             |
|-----------------------------|-----------------------------------------------------------------------------------------|------------------------------------------------------------------------------------------------------------------------------------------|-------------------------------------------------------------|----------------------|-------|--------------|----------|-------------------------|------------------------|--------------------|-------------------------------------------------------------------|
| <i>Ongoing Study</i>        |                                                                                         |                                                                                                                                          |                                                             |                      |       |              |          |                         |                        |                    |                                                                   |
| Media Report & News Release | San Miguel County, Colorado, United States (United Biomedical)                          | Not reported, not reported (0%, 0%, none stated)                                                                                         | Sampled all members of the population                       | General population   | 986   | Not reported | N/A      | 0.8% (NR)               | 1,121                  | High               |                                                                   |
|                             | United States (Crush The Curve Idaho)                                                   | University of Washington has made tests available, not reported (100%, 99.6%, none stated)                                               | Individuals volunteer to be tested and go to a testing site | Unspecified patients | 1,946 | Not reported | N/A      | 1.8% (NR)               | 1,046                  | Moderate           |                                                                   |
|                             | Chelsea, Massachusetts, United States (Massachusetts General Hospital)                  | BioMedomics, IgG, IgM LFIA (88.66%, 90.63%, none stated)                                                                                 | Randomly asking individuals who walked by                   | General Population   | 200   | Not reported | N/A      | 31.5% (NR)              | 6,287                  | High               | Targeting 200 people/day in main study; pilot study reported here |
|                             | New York City, New York, United States (New York State Department of Health)            | New York State Department of Health Wadsworth Public Health Lab, Not reported Not reported (0%, 0%, USA FDA Emergency Use Authorization) | Random sample outside supermarkets and big-box stores       | General Population   | 1,300 | Not reported | N/A      | 21% (NR)                | 13,368                 | Unclear            | Testing conducted over two days in April, exact dates unclear     |
|                             | Long Island, New York, United States (New York State Department of Health)              | New York State Department of Health Wadsworth Public Health Lab, Not reported Not reported (0%, 0%, USA FDA Emergency Use Authorization) | Random sample outside supermarkets and big-box stores       | General Population   |       | Not reported | N/A      | 16.7% (NR)              | 13,368                 | Unclear            | Testing conducted over two days in April, exact dates unclear     |
|                             | New York, United States (New York State Department of Health)                           | New York State Department of Health Wadsworth Public Health Lab, Not reported Not reported (0%, 0%, USA FDA Emergency Use Authorization) | Random sample outside supermarkets and big-box stores       | General Population   | 3,000 | Not reported | N/A      | 13.9% (NR)              | 13,690                 | Unclear            | Testing conducted over two days in April, exact dates unclear     |
|                             | Upstate (19 counties), New York, United States (New York State Department of Health)    | New York State Department of Health Wadsworth Public Health Lab, Not reported Not reported (0%, 0%, USA FDA Emergency Use Authorization) | Random sample outside supermarkets and big-box stores       | General Population   |       | Not reported | N/A      | 3.9% (NR)               | 13,690                 | Unclear            | Testing conducted over two days in April, exact dates unclear     |
|                             | Westchester and Rockland, New York, United States (New York State Department of Health) | New York State Department of Health Wadsworth Public Health Lab, Not reported Not reported (0%, 0%, USA FDA Emergency Use Authorization) | Random sample outside supermarkets and big-box stores       | General Population   |       | Not reported | N/A      | 11.7% (NR)              | 13,368                 | Unclear            | Testing conducted over two days in April, exact dates unclear     |

Supplemental Table 5

| Source Type                 | Region (Primary organization)                                                           | Test Characteristics (Test Manufacturer, Type, Sn, Sp, Regulatory Approval)                                                              | Sampling frame and method                                                                                                           | Population Sampled                                | N     | Dates        | Adjusted | Seroprevalence (95% CI) | Confirmed Cases Per 1M | Risk of Bias (JBI) | Notes                                                          |
|-----------------------------|-----------------------------------------------------------------------------------------|------------------------------------------------------------------------------------------------------------------------------------------|-------------------------------------------------------------------------------------------------------------------------------------|---------------------------------------------------|-------|--------------|----------|-------------------------|------------------------|--------------------|----------------------------------------------------------------|
| Media Report & News Release | Brevard County, Florida, United States (OMNI Healthcare)                                | Not reported, IgM, IgG LFIA (100%, 100%, USA FDA Emergency Use Authorization)                                                            | Drive through facility available to those who have previously been tested for the virus will be permitted to take an antibody test. | Individuals previously tested for COVID-19        | 1,000 | 04/17-04/24  | N/A      | 1% (NR)                 | 1,133                  | High               |                                                                |
|                             | Miami, Florida, United States (Miami-Dade County & University of Miami)                 | BioMedomics, North Carolina, IgG, IgM Immunochromatographic test (88.66%, 90.63%, none stated)                                           | random sampling based on age, address, other demographic information                                                                | General population                                |       | Not reported | N/A      | 6% (4.4-7.9%)           | 1,439                  | Unclear            | Sampling started early April                                   |
|                             | New York City, New York, United States (New York State Department of Health)            | New York State Department of Health Wadsworth Public Health Lab, Not reported Not reported (0%, 0%, USA FDA Emergency Use Authorization) | Random sample outside supermarkets and big-box stores                                                                               | General population                                |       | Not reported | N/A      | 24.7% (NR)              | 14,985                 | Unclear            | Second wave of results from the New York State Study           |
|                             | Long Island, New York, United States (New York State Department of Health)              | New York State Department of Health Wadsworth Public Health Lab, Not reported Not reported (0%, 0%, USA FDA Emergency Use Authorization) | Random sample outside supermarkets and big-box stores                                                                               | General population                                |       | Not reported | N/A      | 14.4% (NR)              | 14,985                 | Unclear            | Second wave of results from the New York State Study           |
|                             | New York, United States (New York State Department of Health)                           | New York State Department of Health Wadsworth Public Health Lab, Not reported Not reported (0%, 0%, USA FDA Emergency Use Authorization) | Random sample outside supermarkets and big-box stores                                                                               | General Population                                | 7,500 | Not reported | N/A      | 14.9% (NR)              | 14,985                 | Unclear            | Second wave of results from the New York State Study           |
|                             | Upstate (19 counties), New York, United States (New York State Department of Health)    | New York State Department of Health Wadsworth Public Health Lab, Not reported Not reported (0%, 0%, USA FDA Emergency Use Authorization) | Random sample outside supermarkets and big-box stores                                                                               | General population                                |       | Not reported | N/A      | 3.2% (NR)               | 14,985                 | Unclear            | Second wave of results from the New York State Study           |
|                             | Westchester and Rockland, New York, United States (New York State Department of Health) | New York State Department of Health Wadsworth Public Health Lab, Not reported Not reported (0%, 0%, USA FDA Emergency Use Authorization) | Random sample outside supermarkets and big-box stores                                                                               | General population                                |       | Not reported | N/A      | 15.1% (NR)              | 14,985                 | Unclear            | Second wave of results from the New York State Study           |
|                             | Claremont, New Hampshire, United States (ClearChoiceMD )                                | Quest Diagnostics, not reported (90%, 0%, none stated)                                                                                   | Self referral                                                                                                                       | Health care workers in the Clear Choice MD system | 47    | Not reported | N/A      | 2% (NR)                 | 1,442                  | Unclear            |                                                                |
| <b>Completed Study</b>      |                                                                                         |                                                                                                                                          |                                                                                                                                     |                                                   |       |              |          |                         |                        |                    |                                                                |
| Media Report & News Release | Gangelt, Heinsberg, Germany (University Hospital in Bonn)                               | Not reported, not reported (0%, 0%, none stated)                                                                                         | Not clear from main article                                                                                                         | General Population                                | 500   | Not reported | N/A      | 14% (NR)                | 1,352                  | High               | Actual report is in German and likely has more extraction data |

Supplemental Table 5

| Source Type                                                    | Region (Primary organization)                                                          | Test Characteristics (Test Manufacturer, Type, Sn, Sp, Regulatory Approval)    | Sampling frame and method                                                                                 | Population Sampled  | N            | Dates          | Adjusted                   | Seroprevalence (95% CI) | Confirmed Cases Per 1M | Risk of Bias (JBI)                                                                                   | Notes                                                  |
|----------------------------------------------------------------|----------------------------------------------------------------------------------------|--------------------------------------------------------------------------------|-----------------------------------------------------------------------------------------------------------|---------------------|--------------|----------------|----------------------------|-------------------------|------------------------|------------------------------------------------------------------------------------------------------|--------------------------------------------------------|
|                                                                | Baton Rouge, Florida, United States (Baton Rouge General Hospital)                     | Not reported, not reported (98.6%, 0%, none stated)                            | Not specified                                                                                             | General population  | 432          | Not reported   | N/A                        | 4.4% (NR)               | 1,560                  | Unclear                                                                                              | Test was developed by the Mayo Clinic                  |
|                                                                | Los Angeles County, California, United States (University of Southern California)      | Premier Biotech, IgG, IgM LFIA (80.3%, 99.5%, none stated)                     | Random sampling via market research firm                                                                  | General Population  | 863          | 04/10-04/11    | Unadjusted                 | 4.1% (2.8-5.6%)         | 503                    | Moderate                                                                                             |                                                        |
|                                                                | Geneva, Geneva, Switzerland (University Hospitals of Geneva)                           | Not reported, not reported (0%, 0%, none stated)                               | Random sampling of individuals who previously participated in an annual health survey                     | General Population  | 343          | 04/06-04/10    | N/A                        | 3.5% (1.6-5.4%)         | 2,438                  | Moderate                                                                                             |                                                        |
|                                                                |                                                                                        |                                                                                |                                                                                                           |                     | 417          | 04/14-04/17    | N/A                        | 5.5% (3.3-7.7%)         | 2,968                  | Moderate                                                                                             |                                                        |
| Singapore, Singapore (National Centre for Infectious Diseases) | Not reported, not reported (0%, 0%, none stated)                                       | Not specified                                                                  | Close contacts of infected individuals                                                                    |                     | Not reported | N/A            | 5.2% (NR)                  | 2,556                   | Unclear                | Close contacts and household members of confirmed COVID-19 patients, sometime between February-April |                                                        |
| Preprint                                                       | Santa Clara Valley, California, United States (Stanford University School of Medicine) | Premier Biotech, IgG, IgM LFIA (80.3%, 99.5%, none stated)                     | Facebook ads targeted a representative sample of the county by demographic and geographic characteristics | General Population  | 3,330        | starting 04/03 | Population Adjusted        | 2.8% (1.5-4.2%)         | 274                    | Moderate                                                                                             |                                                        |
|                                                                |                                                                                        |                                                                                |                                                                                                           |                     |              |                | Population & Test Adjusted | 2.8% (2-3.5%)           | 274                    | Moderate                                                                                             | Average of range used.                                 |
|                                                                |                                                                                        |                                                                                |                                                                                                           |                     |              |                | Unadjusted                 | 1.5% (1.1-2%)           | 274                    | Moderate                                                                                             |                                                        |
|                                                                | Scotland (University of Oxford)                                                        | Not specified, IgM, IgG ELISA, Microneutralization assay (0%, 0%, none stated) | Not specified                                                                                             | Recent blood donors | 1,000        | 03/17-03/23    | Unadjusted                 | 1.2% (NR)               | 23                     | High                                                                                                 | Used UK for confirmed cases per 1M                     |
|                                                                | Paris, Oise, France (Institut Pasteur; Bichat-Claude Bernard University Hospital)      | Designed by authors, IgG, IgA, IgM ELISA, S-FLOW, LIPS (0%, 0%, none stated)   | Blood donor samples were taken from anonymized samples.                                                   | Recent blood donors | 200          | 03/20-03/24    | Unadjusted                 | 3% (NR)                 | 168                    | High                                                                                                 | Positivity rate was between 1-3% with different assays |
|                                                                | Denmark (Aarhus University)                                                            | Livzon Diagnostics Inc, IgG, IgM LFIA (83%, 100%, none stated)                 | Samples from the first 9,496 individuals to donate blood in the study period were tested                  | Recent blood donors | 9,496        | 04/06-04/17    | Test unadjusted            | 1.7% (0.9-2.3%)         | 754                    | Moderate                                                                                             | Was adjusted for assay sensitivity and specificity     |
| Unadjusted                                                     |                                                                                        |                                                                                |                                                                                                           |                     |              |                | 1.8% (1.6-2.1%)            | 754                     | Moderate               |                                                                                                      |                                                        |

Supplemental Table 5

| Source Type                                           | Region (Primary organization)                                                          | Test Characteristics (Test Manufacturer, Type, Sn, Sp, Regulatory Approval) | Sampling frame and method                                                                                         | Population Sampled                                | N            | Dates          | Adjusted            | Seroprevalence (95% CI) | Confirmed Cases Per 1M | Risk of Bias (JBI) | Notes                                                        |
|-------------------------------------------------------|----------------------------------------------------------------------------------------|-----------------------------------------------------------------------------|-------------------------------------------------------------------------------------------------------------------|---------------------------------------------------|--------------|----------------|---------------------|-------------------------|------------------------|--------------------|--------------------------------------------------------------|
|                                                       | Oise, France (Institut Pasteur; Sorbonne Université)                                   | Institut Pasteur, IgG ELISA, S-FLOW, LIPS (0%, 99%, none stated)            | Pupils, family members and staff were invited via email to participate in the investigation                       | High school staff (non-teachers)                  | 27           | starting 03/30 | Unadjusted          | 59.3% (NR)              | 615                    | High               |                                                              |
|                                                       |                                                                                        |                                                                             |                                                                                                                   | High school students                              | 240          | starting 03/30 | Unadjusted          | 38.3% (NR)              | 615                    | High               |                                                              |
|                                                       |                                                                                        |                                                                             |                                                                                                                   | High school teachers                              | 53           | starting 03/30 | Unadjusted          | 43.4% (NR)              | 615                    | High               |                                                              |
|                                                       |                                                                                        |                                                                             |                                                                                                                   | High school related people                        | 661          | starting 03/30 | Unadjusted          | 25.9% (22.6-24.9%)      | 615                    | High               |                                                              |
|                                                       |                                                                                        |                                                                             |                                                                                                                   | Parents of high school students                   | 211          | starting 03/30 | Unadjusted          | 11.4% (NR)              | 615                    | High               |                                                              |
|                                                       |                                                                                        |                                                                             |                                                                                                                   | Siblings of high school students                  | 127          | starting 03/30 | Unadjusted          | 10.2% (NR)              | 615                    | High               |                                                              |
|                                                       | Guilan, Iran (Guilan University of medical sciences)                                   | VivaChek, IgM, IgG RDT (63.3%, 100%, none stated)                           | Random sampling design through phone call invitation. Institutional living centres were excluded.                 | General Population                                | 551          | until 04/23    | Population Adjusted | 21% (14-29%)            | 1,024                  | High               | IFR is reported as the mean of the reported range 0.08-0.12% |
|                                                       |                                                                                        |                                                                             |                                                                                                                   |                                                   |              |                | Test adjusted       | 33% (28-39%)            | 1,024                  | High               | IFR is reported as the mean of the reported range 0.08-0.12% |
|                                                       |                                                                                        |                                                                             |                                                                                                                   |                                                   |              |                | Unadjusted          | 22% (19-26%)            | 1,024                  | High               | IFR is reported as the mean of the reported range 0.08-0.12% |
|                                                       | Kobe, Hyogo Prefecture, Japan (Kobe City Medical Center General Hospital)              | KURABO Industries Lt, IgG Immunochromatographic test (0%, 0%, none stated)  | Randomly selected preserved serum from patients who received blood testing. Fever consultation services excluded. | Outpatients from tertiary care centre (non-COVID) | 1,000        | 03/31-04/07    | Population Adjusted | 2.7% (1.8-3.9%)         | 15                     | High               |                                                              |
|                                                       |                                                                                        |                                                                             |                                                                                                                   |                                                   |              |                | Population Adjusted | 3.3% (2.3-4.6%)         | 15                     | High               |                                                              |
| Padova, Veneto, Italy (University Hospital of Padova) | Snibe Diagnostic, IgG, IgM Chemiluminescence Immunoassay (91.21%, 97.33%, none stated) | Not specified                                                               | Health care workers                                                                                               | 133                                               | Not reported | Unadjusted     | 4.5% (NR)           | 3,398                   | High                   |                    |                                                              |
| Government / NGO / Health System Report               | Seattle, Washington, United States (University of Washington)                          | Not reported, not reported (0%, 0%, none stated)                            | Convenience sample using remnant clinical sera                                                                    | Remnant clinical sera                             | 221          | Not reported   | N/A                 | 0.4% (NR)               | 1,964                  | Unclear            |                                                              |
